# Supplementary material for: Inhibition of α-glucosidase, α-amylase, and aldose reductase by potato polyphenolic compounds
Source: PLoS One. 2018 Jan 25;13(1):e0191025. doi: 10.1371/journal.pone.0191025 (PMC5784920; doi:10.1371/journal.pone.0191025)
Supplement: S1 Table — (XLSX) [file pone.0191025.s002.xlsx]

## Sheet: S1 Table 
	The values used to make the graph for figure 3
	Phenolic and anthocyanin compounds present in purple and red potato tubers
	TP				Mean	Std Dev
	CO97222-1R/R	6168.97	5959.96	5846.94	5991.96	163.38
	CO97226-2R/R	6079.98	5551.45	5997.47	5876.3	284.33
	Purple Majesty	4657.96	4359.54	4428.87	4482.15	154.75
	CO97216-1P/P	4995.95	4385.24	5296.82	4892.56	487.39
	Yukon Gold	928.95	938.7	1005.95	957.87	31.45
	Masquerade	900.15	841.25	851.65	864.35	27.98
	Russet Nugget	1220.15	1170.35	1180.86	1190.46	23.76
	RioGrande Russet	1473.25	1449.24	1534.24	1485.35	32.76
	TA
					Mean	Std Dev
	CO97222-1R/R	543.68	534.45	552.35	543.49	8.95
	CO97226-2R/R	525.45	515.53	522.65	521.21	4.18
	Purple Majesty	585.75	595.82	575.74	585.77	8.43
	CO97216-1P/P	655.42	635.65	665.55	652.2	12.41
	The values of mean and standard deviation for Table 4
	IC50 values for inhibition of and α-glucosidse,α-amylase and aldose reductase.
	Potato clones	α-amylase			Mean	Std Deviation
	CO97226-1R/R	29.36	30.52	32.59	30.82	1.34
	CO97222-2R/R	34.96	33.43	33.05	33.81	0.83
	Purple Majesty	30.89	28.12	27.97	28.9933	1.35
	CO97216-1P/P	26.62	24.93	25.02	25.5233	0.79
	Yukon Gold	57.31	59.98	58.15	58.48	1.11472
	Masquerade	56.23	54.81	55.48	55.5	0.59
	Russet Nugget	40.27	42.47	41.29	41.3433	0.89
	Rio Grande Russet	44.55	43.58	46.46	44.8633	1.19
	Acarbose	10.75	14.3	13.55	12.86	1.52771
		α-glucosidase
	CO97226-1R/R	45.58	45.63	46.73	45.98	0.530723
	CO97222-2R/R	47.65	47	48.58	47.7433	0.6484
	Purple Majesty	45.99	45.11	44.52	45.2067	0.604005
	CO97216-1P/P	41.69	43.78	41.81	42.42	0.94
	Yukon Gold	62.48	62.54	63.35	62.79	0.39
	Masquerade	58.25	57.25	58.88	58.12	0.68
	Russet Nugget	79.33	78.38	78.26	78.65	0.478632
	Rio Grande Russet	75.02	74.9	75.41	75.11	0.21
	Acarbose	16.75	15	15.2	15.65	0.782091
		Aldose reductase
	CO97226-1R/R	40.33	40.13	38.19	39.55	0.95
	CO97222-2R/R	45.12	46.43	46.63	46.06	0.64
	Purple Majesty	36.66	34.29	35.75	35.5667	0.976194
	CO97216-1P/P	31.75	32.11	33.58	32.48	0.78
	Yukon Gold	58.63	58.2	59.35	58.72	0.474435
	Masquerade	49.36	48.43	49.7	49.1633	0.52
	Russet Nugget	132.52	126.15	120.26	126.31	5.0064
	Rio Grande Russet	168.7	171.45	178.15	172.76	3.89
	Quercetin	10.75	15.93	14.95	13.87	2.75
	Values used to make the Figures 7, 8 and 9
	Fig 7A
		1/S	1/v([I]=0)	1/v([I]=10)	1/v([20]=20)	1/v([I]=30)	1/v([I]=50)		[I]	slope		[I]	intercept
		1	0.75	1.51	2.24	3.1	4.37		0	0.6314		0	0.1423
		0.5	0.51	0.93	1.19	1.71	2.28		10	1.352		10	0.1876
		0.33	0.35	0.64	0.89	1.21	1.68		20	1.983		20	0.2389
		0.2	0.29	0.48	0.65	0.85	1.16		30	2.8175		30	0.2857
		0.14	0.18	0.32	0.54	0.69	0.94		50	3.9986		50	0.3457
	Fig 7B
		1/S	1/v([I]=0)	1/v([I]=10)	1/v([20]=20)	1/v([I]=30)	1/v([I]=50)		[I]	slope		[I]	intercept
		1	0.76	1.42	1.89	2.35	3.12		0	0.6066		0	0.1606
		0.5	0.47	0.89	1.25	1.57	2.05		10	1.1344		10	0.294
		0.33	0.35	0.65	0.87	1.05	1.56		20	1.512		20	0.4059
		0.2	0.27	0.54	0.71	0.87	1.09		30	1.8893		30	0.4974
		0.14	0.25	0.43	0.6	0.74	1.01		50	2.4963		50	0.6795
	Fig 8A
		1/S	1/v([I]=0)	1/v([I]=10)	1/v([20]=20)	1/v([I]=30)	1/v([I]=50)		[I]	slope		[I]	intercept
		1	0.74	1.48	2.2	3.19	4.42		0	0.6743		0	0.1001
		0.5	0.51	0.89	1.15	1.57	2.12		10	1.36		10	0.1478
		0.333333	0.34	0.61	0.81	1.18	1.64		20	1.9841		20	0.1945
		0.2	0.22	0.43	0.65	0.87	1.2		30	2.955		30	0.2319
		0.142857	0.15	0.29	0.48	0.72	0.94		50	4.025		50	0.3122
	Fig 8B
		1/S	1/v([I]=0)	1/v([I]=10)	1/v([20]=20)	1/v([I]=30)	1/v([I]=50)		[I]	slope		[I]	intercept
		1	0.88	1.49	2.1	2.67	3.65		0	0.7928		0	0.1234
		0.5	0.61	0.91	1.15	1.51	2.05		10	1.2925		10	0.2175
		0.33	0.35	0.65	0.87	1.05	1.45		20	1.8151		20	0.272
		0.2	0.27	0.48	0.65	0.87	1.19		30	2.2855		30	0.3692
		0.14	0.21	0.37	0.54	0.71	0.98		50	3.1196		50	0.5063
	Fig 9A
		1/S	1/v([I]=0)	1/v([I]=10)	1/v([20]=20)	1/v([I]=30)	1/v([I]=50)		[I]	slope		[I]	intercept
		1	0.88	1.62	2.15	2.66	3.54		0	0.7535		0	0.1266
		0.5	0.5	0.95	1.15	1.57	2.05		10	1.3807		10	0.2388
		0.33	0.35	0.65	0.87	1.05	1.56		20	1.8079		20	0.3091
		0.2	0.27	0.54	0.71	0.87	1.09		30	2.2584		30	0.3988
		0.14	0.25	0.43	0.6	0.74	1.01		50	2.9963		50	0.5459
	Fig 9B
		1/S	1/v([I]=0)	1/v([I]=10)	1/v([20]=20)	1/v([I]=30)	1/v([I]=50)		[I]	slope		[I]	intercept
		1	0.79	1.34	1.73	2.2	3.12		0	0.5968		0	0.1825
		0.5	0.45	0.87	1.09	1.37	1.87		10	1.0226		10	0.3271
		0.33	0.37	0.65	0.87	1.05	1.61		20	1.3295		20	0.4094
		0.2	0.31	0.54	0.65	0.87	1.21		30	1.6637		30	0.5318
		0.14	0.28	0.46	0.6	0.78	1.09		50	2.3522		50	0.7563
